# Supplementary material
Source: PubMed Central journal article supplement (PMC10514011)
Supplement: 12105_2023_1543_MOESM2_ESM.pdf [file 12105_2023_1543_MOESM2_ESM.pdf]

**Table S2.** Search strategy

**Article title:** Clinicopathological analysis of actinic cheilitis: A systematic review with meta-analyses

**Journal:** Head and Neck Pathology

**Authors:** Mailon Cury Carneiro<sup>1</sup>, Milenka Gabriela Quenta Huayhua<sup>1</sup>, Mariela Peralta Mamani<sup>1</sup>, Heitor Marques Honório<sup>2</sup>, Paulo Sérgio da Silva Santos<sup>1</sup>, Izabel Regina Fischer Rubira-Bullen<sup>1</sup>, Cássia Maria Fischer Rubira<sup>1</sup>

**Institution:** <sup>1</sup>Department of Surgery, Stomatology, Pathology, and Radiology, Bauru School of Dentistry, University of São Paulo. Alameda Octávio Pinheiro Brisolla, 9-75, Bauru, SP, 17012-901, Brazil; <sup>2</sup>Department of Pediatric Dentistry, Orthodontics, and Collective Health, Bauru School of Dentistry, University of São Paulo. Alameda Octávio Pinheiro Brisolla, 9-75, Bauru, SP, 17012-901, Brazil.

**Corresponding author:** Cássia Maria Fischer Rubira. Department of Surgery, Stomatology, Pathology, and Radiology, Bauru School of Dentistry - University of São Paulo, Bauru - São Paulo, Brazil. Alameda Octávio Pinheiro Brisola, 9-75, Vila Universitária ZIP CODE: 17012-901 Bauru-SP / Brazil. Telephone: +55 14 32358254; Fax: +55 14 32358258. E-mail: [rubira@fob.usp.br](mailto:rubira@fob.usp.br).

**Table S2.** Search strategy

| <b>DATA BASE</b>                                    | <b>STRATEGY</b>                                                                                                                                                                                                                                                                                                                                                                                                                                                                                                                                                                                                                                                                                                                                                                                                                                                                                                                                                                                                                                                                                                                                         |
|-----------------------------------------------------|---------------------------------------------------------------------------------------------------------------------------------------------------------------------------------------------------------------------------------------------------------------------------------------------------------------------------------------------------------------------------------------------------------------------------------------------------------------------------------------------------------------------------------------------------------------------------------------------------------------------------------------------------------------------------------------------------------------------------------------------------------------------------------------------------------------------------------------------------------------------------------------------------------------------------------------------------------------------------------------------------------------------------------------------------------------------------------------------------------------------------------------------------------|
| <b>PubMed/MEDLINE</b><br><b>248 results</b>         | #1 "Actinic cheilitis" [Supplementary Concept] OR (Actinic cheilosis) OR (solar cheilitis) OR (solar cheilosis) OR (actinic cheiloses) #2 "Classification"[Mesh] OR Classifications OR Systematics OR Taxonomy OR Taxonomies OR "Diagnosis, Oral"[Mesh] OR (Oral Diagnosis) OR (Diagnoses, Oral) OR (Oral Diagnoses) OR (Examination, Oral) OR (Examinations, Oral) OR (Oral Examinations) OR (Oral Examination) OR "Diagnosis"[Mesh] OR Diagnoses OR (Diagnoses and Examinations) OR (Examinations and Diagnoses) OR (Clinical Diagnosis) OR (Diagnosis, Clinical) OR "Early Diagnosis"[Mesh] OR (Diagnosis, Early) OR (Disease Early Detection) OR (Early Detection of Disease) OR (Clinical Criterion) OR (clinical score) OR score OR degrees OR degree OR (clinical subtype) OR (clinical subtypes)                                                                                                                                                                                                                                                                                                                                                |
| <b>Embase (via Elsevier)</b><br><b>460 results</b>  | #1 'actinic cheilitis'/exp OR 'actinic cheilosis' OR 'solar cheilitis' OR 'solar cheilosis' OR 'actinic cheiloses' #2 'classification'/exp OR 'categorisation' OR 'categorization' OR 'category tree' OR 'classification' OR 'classification tree' OR 'classification algorithm'/exp OR 'classification algorithm' OR 'classification algorithms' OR 'diagnostic procedure'/exp OR 'diagnosis, measurement and analysis' OR 'diagnostic method' OR 'diagnostic procedure' OR 'diagnostic procedures' OR 'diagnostic techniques' OR 'diagnostic techniques and procedures' OR 'diagnosis'/exp OR 'diagnosis' OR 'diagnostic screening' OR 'diagnostic screening programs' OR 'diagnostic sign' OR 'diagnostic tool' OR 'diagnostics' OR 'disease diagnosis' OR 'medical diagnosis' OR 'physical diagnosis' OR 'oral diagnosis' OR 'diagnoses, oral' OR 'oral diagnoses' OR 'examination, oral' OR 'clinical diagnosis'/exp OR 'early diagnosis'/exp OR 'diagnosis, early' OR 'early diagnosis' OR 'disease early detection' OR 'clinical criterion' OR 'clinical score' OR 'clinical subtype' OR 'clinical subtypes' OR 'score' OR 'degrees' OR 'degree' |
| <b>Virtual Health Library</b><br><b>446 results</b> | #1 "Actinic cheilitis" OR "Actinic cheilosis" OR "solar cheilitis" OR "solar cheilosis" OR "actinic cheiloses" OR "queilite actínica" OR "Queilitis actínica" #2 mh:Diagnóstico OR Diagnóstico OR Diagnose OR Diagnosis OR Diagnoses OR "Diagnoses and Examinations" OR "Examinations and Diagnoses" OR                                                                                                                                                                                                                                                                                                                                                                                                                                                                                                                                                                                                                                                                                                                                                                                                                                                 |

**Table S2.** Search strategy

---

Diagnóstico OR Diagnosis OR mh:E01\$ OR mh:SP4.051.512\$ OR mh:"Diagnóstico Bucal" OR "Diagnóstico Bucal" OR "Exame Bucal" OR "Examen Oral" OR "Diagnosis, Oral" OR "Diagnoses, Oral" OR "Examination, Oral" OR "Examinations, Oral" OR "Oral Diagnoses" OR "Oral Diagnosis" OR "Oral Examination" OR "Oral Examinations" OR mh:E06.342\$ OR mh:"Diagnóstico Precoce" OR "Diagnóstico Precoce" OR "Early Diagnosis" OR "Diagnosis, Early" OR "Disease Early Detection" OR "Early Detection of Disease" OR "Diagnóstico Precoz" OR "Diagnóstico Temprano" OR mh:E01.390\$ OR mh:"Diagnóstico Clínico" OR "Diagnóstico Clínico" OR "Clinical Diagnosis" OR "Diagnosis, Clinical" OR mh:HP2.018.224\$ OR mh:Classificação OR Classificação OR Sistemática OR Taxonomia OR Classification OR Classifications OR Systematics OR Taxonomies OR Taxonomy OR Clasificación OR Taxonomía OR mh:L01.100\$ OR mh:L01.453.245.275\$ OR "Clinical Criterion" OR "clinical score" OR "clinical subtype" OR "clinical subtypes" OR score OR degrees OR degree

**Scopus**  
**198 results**

(TITLE-ABS-KEY ( ( "Actinic cheilitis" OR "Actinic cheilosis" OR "solar cheilitis" OR "solar cheilosis" OR "actinic cheiloses" ) ) AND TITLE-ABS-KEY ( ( Classification OR Classifications OR Systematics OR Taxonomy OR Taxonomies OR "Diagnosis, Oral" OR "Oral Diagnosis" OR "Diagnoses, Oral" OR "Oral Diagnoses" OR "Examination, Oral" OR "Examinations, Oral" OR "Oral Examinations" OR "Oral Examination" OR Diagnosis OR Diagnoses OR "Diagnoses and Examinations" OR "Examinations and Diagnoses" OR "Clinical Diagnosis" OR "Diagnosis, Clinical" OR "Early Diagnosis" OR "Diagnosis, Early" OR "Disease Early Detection" OR "Early Detection of Disease" OR "Clinical Criterion" OR "clinical score" OR score OR degrees OR degree OR "clinical subtype" OR "clinical subtypes" ) ) )

---

**Table S2.** Search strategy

---

**Web of Science**  
**137 results**

TÓPICO: ("Actinic cheilitis" OR "Actinic cheilosis" OR "solar cheilitis" OR "solar cheilosis" OR "actinic cheiloses") AND TÓPICO: (Classification OR Classifications OR Systematics OR Taxonomy OR Taxonomies OR "Diagnosis, Oral" OR "Oral Diagnosis" OR "Diagnoses, Oral" OR "Oral Diagnoses" OR "Examination, Oral" OR "Examinations, Oral" OR "Oral Examinations" OR "Oral Examination" OR Diagnosis OR Diagnoses OR "Diagnoses and Examinations" OR "Examinations and Diagnoses" OR "Clinical Diagnosis" OR "Diagnosis, Clinical" OR "Early Diagnosis" OR "Diagnosis, Early" OR "Disease Early Detection" OR "Early Detection of Disease" OR "Clinical Criterion" OR "clinical score" OR score OR degrees OR degree OR "clinical subtype" OR "clinical subtypes") Tempo estipulado: Todos os anos. Índices: SCI-EXPANDED, SSCI, A&HCI, CPCI-S, CPCI-SSH, ESCI.

**Brazilian Digital Library of Theses and Dissertations**  
**68 results**

Busca: (Todos os campos:queilite OR quilite OR quilose OR cheilitis OR cheilitides OR queilitis OR (Actinic cheilitis) OR (Actinic cheilosis) OR (solar cheilitis) OR (solar cheilosis) OR (actinic cheiloses) OR (queilite actínica) E Todos os campos:diagnóstico OR achados OR rastreamento OR sinais OR sintomas OR triagem OR (uso diagnóstico) OR diagnosis OR findings OR screening OR signs OR symptoms OR diagnóstico OR hallazcos OR rastreo OR señales OR síntomas OR tamizaje OR (uso diagnóstico) OR classificação OR hierarquia OR hierarquias OR sistemática OR taxonomia OR classification OR hierarchies OR hierarchy OR systematics OR taxonomy OR clasificación OR jerarquia OR jerarquias OR sistemática OR taxonomia OR (clinical score) OR (escore clínico) OR (puntaje clínico) OR (Criterio clínico) OR (Clinical Criterion) OR (critério clínico))

**Google Scholar**  
**255 results**

("Actinic cheilitis" OR "Actinic cheilosis" OR "solar cheilitis" OR "solar cheilosis" OR "queilite actínica") AND (Diagnosis OR Diagnoses OR examination "Clinical Diagnosis" OR "Diagnosis, Clinical" OR "diagnóstico")

---

**Table S2.** Search strategy

---

**ProQuest**  
**320 results**

("Actinic cheilitis" OR "Actinic cheilosis" OR "solar cheilitis" OR "solar cheilosis" OR "actinic cheiloses")  
AND ("classification" OR "score" OR "criterion" OR "Diagnosis" OR "Diagnoses" OR "examination" "Clinical Diagnosis" OR "Diagnosis, Clinical" OR "Early Diagnosis" OR "Diagnosis, Early" OR "Disease Early Detection" OR "Early Detection of Disease" OR "Clinical Criterion" OR "clinical score" OR "clinical subtype" OR "clinical subtypes")

---
