# Supplementary material
Source: PubMed Central journal article supplement (PMC10514011)
Supplement: 12105_2023_1543_MOESM3_ESM.pdf [file 12105_2023_1543_MOESM3_ESM.pdf]

**Table S3.** Articles excluded in the full reading phase with their respective justifications

**Article title:** Clinicopathological analysis of actinic cheilitis: A systematic review with meta-analyses

**Journal:** Head and Neck Pathology

**Authors:** Mailon Cury Carneiro<sup>1</sup>, Milenka Gabriela Quenta Huayhua<sup>1</sup>, Mariela Peralta Mamani<sup>1</sup>, Heitor Marques Honório<sup>2</sup>, Paulo Sérgio da Silva Santos<sup>1</sup>, Izabel Regina Fischer Rubira-Bullen<sup>1</sup>, Cássia Maria Fischer Rubira<sup>1</sup>

**Institution:** <sup>1</sup>Department of Surgery, Stomatology, Pathology, and Radiology, Bauru School of Dentistry, University of São Paulo. Alameda Octávio Pinheiro Brisolla, 9-75, Bauru, SP, 17012-901, Brazil; <sup>2</sup>Department of Pediatric Dentistry, Orthodontics, and Collective Health, Bauru School of Dentistry, University of São Paulo. Alameda Octávio Pinheiro Brisolla, 9-75, Bauru, SP, 17012-901, Brazil.

**Corresponding author:** Cássia Maria Fischer Rubira. Department of Surgery, Stomatology, Pathology, and Radiology, Bauru School of Dentistry - University of São Paulo, Bauru - São Paulo, Brazil. Alameda Octávio Pinheiro Brisola, 9-75, Vila Universitária ZIP CODE: 17012-901 Bauru-SP / Brazil. Telephone: +55 14 32358254; Fax: +55 14 32358258. E-mail: [rubira@fob.usp.br](mailto:rubira@fob.usp.br).

**Table S3.** Articles excluded in the full reading phase with their respective justifications

| <b>Justification</b>                                                                   | <b>Excluded studies</b>                                                                                                                                                                                                                                                                                                                                                                                                                                                                                                                       |
|----------------------------------------------------------------------------------------|-----------------------------------------------------------------------------------------------------------------------------------------------------------------------------------------------------------------------------------------------------------------------------------------------------------------------------------------------------------------------------------------------------------------------------------------------------------------------------------------------------------------------------------------------|
| <b>General information about other diseases</b>                                        | Ochsenius et al., 2003; Kornevs et al., 2005; Bezerra et al., 2011; Curra et al., 2016; Rampi et al., 2019; Pires et al., 2020; Torabi et al., 2021.                                                                                                                                                                                                                                                                                                                                                                                          |
| <b>The studies do not bring clinical and microscopic features</b>                      | Araújo et al., 2007; Nico et al., 2007; Lemos et al., 2009; Araújo et al., 2012; Lucena et al., 2012; Pilati, 2012; Arnaud et al., 2014; Câmara et al., 2016; Sarmiento et al., 2016; Rojas et al., 2017; Pilati et al., 2017; Gonzaga et al., 2020; Silva et al., 2006; Bertini et al., 2010; Miranda et al., 2012; Cintra et al., 2013; Orozco et al., 2013; Miranda et al., 2014; Ribeiro et al., 2014; Queiroz, 2016; Barreto, 2017; Poitevin et al., 2017; dos Santos et al., 2018; Rodríguez-Blanco et al., 2019; Moreira et al., 2020. |
| <b>The studies do not bring specific and descriptive characteristics of the sample</b> | Torres et al., 2001; Vieira, 2010; Piñera-Marques et al., 2010; Sarmiento et al., 2014; Boldes et al., 2016; Cosci et al., 2016; Nogueira et al., 2016; Ríos et al., 2017; Rodríguez-Blanco et al., 2018; Silva et al., 2020; Melo et al., 2021.                                                                                                                                                                                                                                                                                              |
| <b>Studies on other types of cheilitis</b>                                             | Ito et al., 2014; Lugovic-Mihic et al., 2018; Lugovic-Mihic et al., 2020.                                                                                                                                                                                                                                                                                                                                                                                                                                                                     |
| <b>Case series studies</b>                                                             | Kaugars et al., 1999.                                                                                                                                                                                                                                                                                                                                                                                                                                                                                                                         |
| <b>Literature review studies</b>                                                       | Savage et al., 2010; Vieira et al., 2012; Osorio et al., 2016; Bravo-Calderón et al., 2021.                                                                                                                                                                                                                                                                                                                                                                                                                                                   |
| <b>Only published abstracts of conferences</b>                                         | Navarro & Bufalino, 2007; Armenores et al., 2009; Spyridonos et al., 2013; Choi & Chan, 2014; Navarro et al., 2015; Fernandes et al., 2016; Minicucci et al., 2016; Dirschnabel et al., 2020; Gonçalves et al., 2020; Rocha et al., 2020.                                                                                                                                                                                                                                                                                                     |
| <b>Articles without full access</b>                                                    | Nicolini et al., 1989; Main & Pavone, 1994; Vega & Dominguez, 1996; Pires et al., 2001; Nico, 2004; Urberuaga et al., 2012.                                                                                                                                                                                                                                                                                                                                                                                                                   |

**Table S3.** Articles excluded in the full reading phase with their respective justifications

Ochsenius G, Ormeño A, Godoy L, Rojas R. Estudio retrospectivo de 232 casos de cáncer y precáncer de labio en pacientes chilenos. Correlación clínico-histológica. *Rev Med Chil.* 2003;131(1):60–6.

Kornevs E, Skagers A, Tars J, Bigestans A, Lauskis G, Libermanis O. 5 year experience with lower lip cancer. *Stomatologija.* 2005;7(3):95–8.

Bezerra SM, Orii NM, Duarte AJ, Sotto MN, Alves C. Efeitos da radiação solar crônica prolongada sobre o sistema imunológico de pescadores profissionais em Recife (PE), Brasil. *An Bras Dermatol.* 2011;86(2):222–3.

Curra M, Salvadori G, Junges R, Hugo FN, Martins MD. Accuracy of clinical diagnosis for the identification of potentially malignant disorders and malignant lip lesions. *Braz Oral Res.* 2016;30(1):e135.

Rampi PT, Gambin DJ, Leal LO, Hauck KE, Silva AH, Linden MS, et al. Profile of patients with white lesions of the oral mucosa treated at a Dental School in Southern Brazil. *J Clin Diagn Res [Internet].* 2019;13(11):ZC05–9. Available from: <https://www.embase.com/search/results?subaction=viewrecord&id=L2004581365&from=export>

Pires FR, Barreto ME, Nunes JG, Carneiro NS, Azevedo AB, Dos Santos TC. Oral potentially malignant disorders: clinical-pathological study of 684 cases diagnosed in a Brazilian population. *Med Oral Patol Oral Cir Bucal.* 2019/12/28. 2020;25(1):e84–8.

Torabi M, Afshar MK, Afshar HM, Mohammazadeh I. Correlation between clinical and histopathologic diagnosis of oral potentially malignant disorder and oral squamous cell carcinoma. *Pesqui Bras Odontopediatria Clín Integr.* 2021;21:e0143.

Araújo CP, Barros AC, Lima AA, Azevedo RA, Ramalho L, Santos JN. Estudo histológico e histoquímico da elastose solar em lesões de queilite actínica. *R Ci méd biol.* 2007;6(2):152–9.

Nico MM, Rivitti EA, Lourenço SV. Actinic cheilitis: histologic study of the entire vermilion and comparison with previous biopsy. *J Cutan Pathol.* 2007/03/27. 2007;34:309–14.

Lemos MA, Maciel TA, Matos FR, Amorim AG, Galvão HC. Actinic Cheilitis : Clinical-Pathological Study of 46 Cases. *Ciênc Biol Saúde.* 2009;11(3):9–12.

**Table S3.** Articles excluded in the full reading phase with their respective justifications

Araújo CP, Vidal MT, Gurgel CA, Ramos EA, Barbosa Junior A de A, Ramalho LM, et al. Queilite actínica: um estudo de 35 casos com destaque para os aspectos morfológicos. Rev Pós Gr [Internet]. 2012;19(1):21–7. Available from: <http://www.arca.fiocruz.br/bitstream/>

Lucena EE, Costa DC, da Silveira EJ, Lima KC. Prevalence and factors associated to actinic cheilitis in beach workers. Oral Dis. 2012/02/18. 2012;18(6):575–9.

Pilati SF. Estudo de características clínicas e histopatológicas da queilite actínica e carcinoma epidermóide de lábio. 2012.

Arnaud RR, Soares MS, Paiva MA, Figueiredo CR, Santos MG, Lira CC. Queilite actínica: avaliação histopatológica de 44 casos. Rev Odontol UNESP. 2014;43(6):384–9.

Câmara PR, Dutra SN, Takahama Júnior A, Fontes K, Azevedo RS. A comparative study using WHO and binary oral epithelial dysplasia grading systems in actinic cheilitis. Oral Dis. 2016/03/31. 2016;22(6):523–9.

Sarmiento DJ, Godoy GP, Miguel MC, Silveira ÉJ. Link between immunoexpression of hMLH1 and hMSH2 proteins and clinical-epidemiological aspects of actinic cheilitis. An Bras Dermatol. 2016/09/01. 2016;91(4):463–7

Rojas IG, Spencer ML, Zapata PA, Martínez A, Alarcón R, Marchesani FJ, et al. CD8+ and FoxP3+ T-cell infiltration in actinic cheilitis. Int J Dermatol. 2017;56(1):54–62.

Pilati SF, Bianco BC, Vieira DS, Modolo F. Histopathologic features in actinic cheilitis by the comparison of grading dysplasia systems. Oral Dis. 2017;23(2):219–24.

Gonzaga AK, Mafra RP, da Silva LP, Freitas R de A, de Souza LB, Pinto LP. Actinic cheilitis: Morphometric parameters and its relationship with the degree of epithelial dysplasia. Acta Histochem [Internet]. 2020;122(1):151452. Available from: <https://doi.org/10.1016/j.acthis.2019.151452>

Silva FD, Daniel FI, Grando LJ, Calvo MC, Rath IB, Fabro SM. Estudo da prevalência de alterações labiais em pescadores da ilha de Santa Catarina. Rev Odont Ciênc– Fac Odonto/PUCRS. 2006;21(51):37–42.

Bertini F, Sgarbi FC, Brandão AA, Cavalcante AS. Análisis del perfil clínico del paciente portador de queilite actínica: importancia para el diagnóstico. Acta Odontológica Venez. 2010;48(3):1–7.

**Table S3.** Articles excluded in the full reading phase with their respective justifications

Miranda AM, Soares LG, Ferrari TM, Silva DG, Falabella ME, Tinoco EM. Prevalence of actinic cheilitis in a population of agricultural sugarcane workers. *Acta Odontol Latinoam* [Internet]. 2012;25(2):201–6. Available from: <https://www.embase.com/search/results?subaction=viewrecord&id=L366373476&from=export>

Cintra JS, Torres SC, Silva MB, Manhães Júnior LR, Silva Filho JP, Junqueira JL. Queilite Actínica: Estudo epidemiológico entre trabalhadores rurais do município de Piracaia - SP. *Rev Assoc Paul Cir Dent* [Internet]. 2013;67(2):118–21. Available from: <http://revodonto.bvsalud.org/pdf/apcd/v67n2/a06v67n2.pdf>

Orozco P, Vásquez S, Venegas B, Rivera C. Prevalence of actinic cheilitis in Chilean workers exposed to ultraviolet radiation. *Rev Clin Periodoncia Implant Rehabil* [Internet]. 2013;6(3):127–9. Available from: [http://www.scielo.cl/scielo.php?script=sci\\_arttext&](http://www.scielo.cl/scielo.php?script=sci_arttext&)

Miranda AM, Ferrari T de M, Leite TC, Cunha KS, Dias EP. Actinic Cheilitis: Clinical Characteristics Observed in 75 Patients and a Summary of the Literature of This Often Neglected Premalignant Disorder. *Int J Clin Med*. 2014;05:1337–44.

Ribeiro A de O, da Silva LC, Martins-Filho PR. Prevalence of and risk factors for actinic cheilitis in Brazilian fishermen and women. *Int J Dermatol* [Internet]. 2014;53(11):1370–6. Available from: <https://www.embase.com/search/results?subaction=viewrecord&id=L53244299&from=export>

Queiroz LR. Queilite actínica em trabalhadores da construção civil do município de Feira de Santana, Bahia. 2016.

Barreto AC. The clinical prevalence of actinic cheilitis among community health agents from the regional V subprefecture of Fortaleza. *Rev Gaucha Odontol*. 2017;65(2):128–33.

Poitevin NA, Rodrigues MS, Weigert KL, Macedo CLR, dos Santos RB. Actinic cheilitis: proposition and reproducibility of a clinical criterion. *BDJ Open* [Internet]. 2017;3:17016. Available from: <http://dx.doi.org/10.1038/bdjopen.2017.16>

dos Santos RF, de Oliveira RL, Gallottini M, Caliento R, Sarmento DJ. Prevalence of and factors associated with actinic cheilitis in extractive mining workers. *Braz Dent J*. 2018;29(2):214–21.

**Table S3.** Articles excluded in the full reading phase with their respective justifications

Rodríguez-Blanco I, Flórez Á, Paredes-Suárez C, Rodríguez-Lojo R, González-Vilas D, Ramírez-Santos A, et al. Actinic Cheilitis: Analysis of Clinical Subtypes, Risk Factors and Associated Signs of Actinic Damage. *Acta Derm Venereol.* 2019;06/15. 2019;99(10):931–2.

Moreira P, Assaf AV, Cortellazzi KL, Takahama Junior A, Azevedo RS. Social and behavioural associated factors of actinic cheilitis in rural workers. *Oral Dis.* 2020;00:1–8

Torres ME, González XG, Rodríguez AF, Gutiérrez EL, Portierra MA. Behavior of actinic cheilitis in 30 patients. *Rev Ciencias Médicas Pinar del Río [Internet].* 2001;5(2):1–7. Available from:

[http://scielo.sld.cu/scielo.php?script=sci\\_arttext&pid=S1561-31942014000200020](http://scielo.sld.cu/scielo.php?script=sci_arttext&pid=S1561-31942014000200020)

Vieira RA. Expressão de apoptose e óxido nítrico sintase indutiva em queilites actínicas e carcinomas espinocelulares do lábio inferior: correlação clínica, histológica e imunoistoquímica. 2010.

Piñera-Marques K, Lorenço SV, da Silva LF, Sotto MN, Carneiro PC. Actinic lesions in fishermen's lower lip: Clinical, cytopathological and histopathologic analysis. *Clinics.* 2010;65(4):363–7.

Sarmiento DJ, Miguel MC, Queiroz LM, Godoy GP, Silveira ÉJ. Actinic cheilitis: clinicopathologic profile and association with degree of dysplasia. *Int J Dermatol.* 2014;53:466–72.

Boldes IP, Azevedo AB, Penoni DC, Andrade MA. Actinic cheilitis : retrospective analysis of 29 of Odontoclínica Central da Marinha. *Rev Nav Odontol.* 2016;43(1):3–7.

Cosci A, Takahama A, Correr WR, Azevedo RS, Fontes KB, Kurachi C. Automated algorithm for actinic cheilitis diagnosis by wide-field fluorescence imaging. *J Med Imaging.* 2016;3(4):044004.

Nogueira MS, Cosci A, Pratavieira S, Takahama Júnior A, Azevedo RS, Kurachi C. Evaluation of actinic cheilitis using fluorescence lifetime spectroscopy. In: Alfano RR, Demos SG, editors. *Proc SPIE Int Soc Opt Eng.* 2016. (Proceedings of SPIE; vol. 9703).

Ríos P, Maldonado C, Norambuena P, Donoso M. Prevalencia de Queilitis Actínica en Pescadores Artesanales, Valdivia, Chile. *Int J Odontostomat.* 2017;11(2):192–7.

Rodríguez-Blanco I, Flórez Á, Paredes-Suárez C, Rodríguez-Lojo R, González-Vilas D,

**Table S3.** Articles excluded in the full reading phase with their respective justifications

Ramírez-Santos A, et al. Actinic cheilitis prevalence and risk factors: A cross-sectional, multicentre study in a population aged 45 years and over in north-west Spain. *Acta Derm Venereol.* 2018;98(10):970–4.

Silva LV, de Arruda JA, Abreu LG, Ferreira RC, da Silva LP, Pelissari C, et al. Demographic and clinicopathologic features of actinic cheilitis and lip squamous cell carcinoma: a brazilian multicentre study. *Head Neck Pathol.* 2020/02/23. 2020;14:899–908.

Melo IG, Vaz FF, da Silva Sobrinho AR, Oliveira NG, Carvalho M de V, Duarte Filho ES, et al. Prevalence of actinic cheilitis in Brazilian semi-arid region farmers. *Rev Cuba Estomatol.* 2021;58(3):e3354.

Ito T, Natsuga K, Tanimura S, Aoyagi S, Shimizu H. Dermoscopic features of plasma cell cheilitis and actinic cheilitis. *Acta Derm Venereol.* 2014/01/30. 2014;94(5):593–4.

Lugovic-Mihic L, Pilipovic K, Crnaric I, Situm M, Duvancic T. Differential Diagnosis of Cheilitis - How to Classify Cheilitis? *Acta Clin Croat.* 2018/11/16. 2018;57(2):342–51.

Lugovic-Mihic L, Blagec T, Japundzic I, Skroza N, Adzajic MD, Mravak-Stipetic M. Diagnostic management of cheilitis: an approach based on a recent proposal for cheilitis classification. *Acta Dermatovenerol Alp Pannonica Adriat.* 2020;29(2):67–72.

Kaugars GE, Pillion T, Svirsky JA, Page DG, Burns JC, Abbey LM. Actinic cheilitis - A review of 152 cases. *Oral Surg Oral Med Oral Pathol Oral Radiol Endod.* 1999;88(2):181–6.

Savage NW, McKay C, Faulkner C. Actinic cheilitis in dental practice. *Aust Dent J.* 2010/06/25. 2010;55:78–84.

Vieira RA, Minicucci EM, Marques MEA, Marques SA. Actinic cheilitis and squamous cell carcinoma of the lip: clinical, histopathological and immunogenetic aspects. *An Bras Dermatol.* 2012;87(1):105–14.

Osorio CH, Palma BF, Cartes-Velásquez R. Queilitis actínica: Aspectos histológicos, clínicos y epidemiológicos. *Rev Cuba Estomatol.* 2016;53(2):45–55.

Bravo-Calderón DM, Pinos-Gavilanes MP, Pinos-Gavilanes DE. Actinic Cheilitis: Clinical, Pathological and Therapeutic Considerations. *Int J Dent Oral Sci.* 2021;08(04):2319–24.

**Table S3.** Articles excluded in the full reading phase with their respective justifications

Navarro CM, Bufalino A. The impact of a Brazilian oral cancer prevention programme on the diagnosis of actinic cheilitis. 2007. p. 159.

Armenores P, James CL, Huilgol SC. Relationships between the clinical presentation, treatment success and histopathological features of actinic cheilitis. *Australas J Dermatol.* 2009;50(1):A29.

Spyridonos P, Gaitanis G, Tzaphlidou M, Bassukas I. Automated evaluation of actinic cheilitis severity by measurement of lip border irregularity. *J Investig Dermatol.* 2013;133:S185.

Choi E-Y, Chan M. Actinic Cheilitis Versus Inflammatory Dermatoses of the Lip: Clinicopathologic Review of 93 Lip Biopsies with Significant Inflammation. 2014. p. 132A.

Navarro CM, Valente VB, Massucato EMS, Onofre MA, Filho VA, Andrade CR. Actinic Cheilitis: clinopathologic correlation for suspicion of malignancy. 2015.

Fernandes LG, Motta AF, Torrezani A, Fréo B, Santos VA, Sugaya N. Actinic cheilitis in a cohort of rural workers in Brazil. *Oral Dis.* 2016;22(2):33.

Minicucci E, Campos E, Almeida J. Vermilionectomy and clinicopathologic profile in Actinic Cheilitis 102 cases. 2016.

Dirschnabel AJ, Einsfeld V, Moterle C, Da Silva AC, De Dea BE, Ramos GD, et al. Demographic characteristics of patients with actinic cheilitis in labial mucosa diagnosed in 2 oncologic care centers. *Oral Surg Oral Med Oral Pathol Oral Radiol.* 2020;129(1):e179.

Gonçalves IM, Barnabé LÉ, Galvão IC, Batista AL, Nonaka CF, Alves PM. Clinicopathologic profile of 60 cases of actinic cheilitis. *Oral Surg Oral Med Oral Pathol Oral Radiol.* 2020;129(1):e166.

Rocha AF, Lança ML, Mito LN, Ferrisse TM, Onofre MA, Andrade CR, et al. The importance of clinical-pathologic monitoring in the evolution of leucoplastic areas in actinic cheilitis. *Oral Surg Oral Med Oral Pathol Oral Radiol.* 2020. p. e64.

Nicolini S, Ascorra C, Guzman C, Latife AV. Queilitis actinica en pescadores artesanales de la Quinta region: prevalencia y aspectos histopatologicos asociados [Actinic cheilitis in Quinta fishing workers: prevalence and associated histopathological aspects]. *Odontol*



**Table S3.** Articles excluded in the full reading phase with their respective justifications

Chil. 1989 Apr;37(1):169-74. Spanish. PMID: 2641953.

Main JH, Pavone M. Actinic cheilitis and carcinoma of the lip. J Can Dent Assoc. 1994 Feb;60(2):113-6. PMID: 8111655.

Vega ME, Dominguez JC. Queilitis actínica: Estudio retrospectivo en 15 pacientes. Dermatología (México, D.F.). 1996;40(1):27-30.

Pires FR, Bueno RH, Alves FA, de Almeida OP. Queilite actínica: aspectos clínicos e preventivos / Actinic cheilitis: clinical and preventive aspects. Rev Assoc Paul Cir Dent. 2001;55(3):200-3

Nico M. Queilite actínica: estudo comparativo entre os achados histopatológicos da biópsia e dos cortes seriados provenientes da vermelhonectomia: estudo de 20 casos / Actinic cheilitis: comparision of microscopic findings on biopsy and on sections of vermilionectomy: a 20 cases study. 2004.

Urberuaga ME, Martín CS, De los Ríos JM. Queilitis actínica. Cient. dent. (Ed. impr.). 2012;9(1): 61-2.
