# Supplementary material
Source: PubMed Central journal article supplement (PMC10514011)
Supplement: 12105_2023_1543_MOESM4_ESM.pdf [file 12105_2023_1543_MOESM4_ESM.pdf]

**Table S4.** General information collected from the studies

**Article title:** Clinicopathological analysis of actinic cheilitis: A systematic review with meta-analyses

**Journal:** Head and Neck Pathology

**Authors:** Mailon Cury Carneiro<sup>1</sup>, Milenka Gabriela Quenta Huayhua<sup>1</sup>, Mariela Peralta Mamani<sup>1</sup>, Heitor Marques Honório<sup>2</sup>, Paulo Sérgio da Silva Santos<sup>1</sup>, Izabel Regina Fischer Rubira-Bullen<sup>1</sup>, Cássia Maria Fischer Rubira<sup>1</sup>

**Institution:** <sup>1</sup>Department of Surgery, Stomatology, Pathology, and Radiology, Bauru School of Dentistry, University of São Paulo. Alameda Octávio Pinheiro Brisolla, 9-75, Bauru, SP, 17012-901, Brazil; <sup>2</sup>Department of Pediatric Dentistry, Orthodontics, and Collective Health, Bauru School of Dentistry, University of São Paulo. Alameda Octávio Pinheiro Brisolla, 9-75, Bauru, SP, 17012-901, Brazil.

**Corresponding author:** Cássia Maria Fischer Rubira. Department of Surgery, Stomatology, Pathology, and Radiology, Bauru School of Dentistry - University of São Paulo, Bauru - São Paulo, Brazil. Alameda Octávio Pinheiro Brisola, 9-75, Vila Universitária ZIP CODE: 17012-901 Bauru-SP / Brazil. Telephone: +55 14 32358254; Fax: +55 14 32358258. E-mail: [rubira@fob.usp.br](mailto:rubira@fob.usp.br).

**Table S4.** General information collected from the studies

| Author / Year                     | Design          | Country | N                              | Sex                                            | Average age                                | Ethnicity                                            | Harmful habits                                                       | Sun exposure       | Symptoms          | Location                     |
|-----------------------------------|-----------------|---------|--------------------------------|------------------------------------------------|--------------------------------------------|------------------------------------------------------|----------------------------------------------------------------------|--------------------|-------------------|------------------------------|
| <b>Markopoulos et al., 2004</b>   | Cross-sectional | Greece  | n=65                           | M=60<br>F=5                                    | 53.1 years                                 | Whites=65                                            | Tobacco=39                                                           | Yes=43             | -                 | Lower lip=65                 |
| <b>Cavalcante et al., 2008</b>    | Cross-sectional | Brazil  | n=29                           | M=21<br>F=8                                    | -                                          | Whites=27<br>Blacks=2                                | Tobacco=8                                                            | -                  | Yes=10            | -                            |
| <b>Piccelli, 2008</b>             | Cross-sectional | Brazil  | n=48                           | M=31<br>F=17                                   | 59.2 years                                 | Whites=48                                            | Tobacco=25<br>Alcohol=3                                              | -                  | Yes=7             | -                            |
| <b>Martins Filho et al., 2011</b> | Cross-sectional | Brazil  | n=40                           | M=25<br>F=15                                   | 59.8 years                                 | Whites=32<br>Blacks=8                                | Tobacco=24                                                           | Yes=40             | Yes=11            | Lower lip=40                 |
| <b>Pacca et al., 2011</b>         | Case-control    | Brazil  | CG:<br>n=29<br><br>AC:<br>n=29 | CG:<br>M=19<br>F=10<br><br>AC:<br>M=19<br>F=10 | CG:<br>55.2 years<br><br>AC:<br>56.1 years | CG:<br>Whites=29<br><br>AC:<br>Whites=29             | CG:<br>Tobacco=10<br>Alcohol=1<br><br>AC:<br>Tobacco=14<br>Alcohol=3 | -                  | AC:<br>Yes=2      | -                            |
| <b>Fernandes, 2013</b>            | Cross-sectional | Brazil  | n=20                           | M=12<br>F=8                                    | 63 years                                   | Whites=20                                            | Tobacco=7<br>Alcohol=3                                               | Yes=20             | Yes=4             | Lower lip=20                 |
| <b>Lopes et al., 2015</b>         | Cross-sectional | Brazil  | n=161                          | M=128<br>F=33                                  | 51.9 years                                 | Whites=120<br>Blacks=1<br>Multiracial=19<br>N.I.= 21 | Tobacco=42<br>Alcohol=21<br>N.I.=18                                  | Yes=118<br>N.I.=14 | Yes=43<br>N.I.=81 | Lower lip=157<br>Upper lip=4 |
| <b>Cremonesi et al., 2017</b>     | Cross-sectional | Brazil  | n=56                           | M=42<br>F=14                                   | 57.7 years                                 | -                                                    | Tobacco=42                                                           | Yes=16             | -                 | Lower lip=52<br>Upper lip=4  |

**Table S4.** General information collected from the studies

|                              |                 |        |              |                      |                    |                                                   |                                  |                |                |                             |
|------------------------------|-----------------|--------|--------------|----------------------|--------------------|---------------------------------------------------|----------------------------------|----------------|----------------|-----------------------------|
| <b>Medeiros, 2018</b>        | Cross-sectional | Brazil | n=20         | M=16<br>F=4          | 57.7 years         | Whites=15<br>Multiracial=5                        | Tobacco=14                       | Yes=15         | -              | -                           |
| <b>Brito et al., 2019</b>    | Cross-sectional | Brazil | n=40         | M=33<br>F=7          | 54.5 years         | Whites=30<br>Multiracial=10                       | Tobacco=10                       | -              | Yes=13         | Lower lip=40                |
| <b>Ferreira, 2019</b>        | Cross-sectional | Brazil | AC:<br>n=25  | AC:<br>M=15<br>F=10  | AC:<br>64.1 years  | AC:<br>Whites=24<br>Blacks=1                      | -                                | -              | -              | AC:<br>Lower lip=25         |
|                              |                 |        | SCC:<br>n=36 | SCC:<br>M=28<br>F=8  | SCC:<br>63.5 years | SCC:<br>Whites=36                                 |                                  |                |                | SCC:<br>Lower lip=36        |
| <b>Rocha, 2019</b>           | Cross-sectional | Brazil | AC:<br>n=131 | AC:<br>M=97<br>F=34  | AC:<br>55.3 years  | AC:<br>Whites=124<br>Multiracial=6<br>Asians=1    | AC:<br>Tobacco=71<br>Alcohol=40  | AC:<br>Yes=51  | AC:<br>Yes=53  | AC:<br>Lower lip=131        |
|                              |                 |        | SCC:<br>n=51 | SCC:<br>M=39<br>F=12 | SCC:<br>60.3 years | SCC:<br>Whites=48<br>Multiracial=2<br>Asians=1    | SCC:<br>Tobacco=41<br>Alcohol=22 | SCC:<br>Yes=17 | SCC:<br>Yes=43 | SCC:<br>Lower lip=51        |
| <b>Abrantes et al., 2021</b> | Cross-sectional | Brazil | n=64         | M=43<br>F=21         | 57 years           | Whites=41<br>Multiracial=5<br>Blacks=1<br>N.I.=17 | -                                | Yes=32         | -              | Lower lip=63<br>Upper lip=1 |

SCC, squamous cell carcinoma; AC, actinic cheilitis; N.I., Not informed.
