# Supplementary material
Source: PubMed Central journal article supplement (PMC10514011)
Supplement: 12105_2023_1543_MOESM5_ESM.pdf [file 12105_2023_1543_MOESM5_ESM.pdf]

**Table S5.** Data regarding clinical features, microscopic features, degrees of dysplasia, and malignancy rate of the included studies

**Article title:** Clinicopathological analysis of actinic cheilitis: A systematic review with meta-analyses

**Journal:** Head and Neck Pathology

**Authors:** Mailon Cury Carneiro<sup>1</sup>, Milenka Gabriela Quenta Huayhua<sup>1</sup>, Mariela Peralta Mamani<sup>1</sup>, Heitor Marques Honório<sup>2</sup>, Paulo Sérgio da Silva Santos<sup>1</sup>, Izabel Regina Fischer Rubira-Bullen<sup>1</sup>, Cássia Maria Fischer Rubira<sup>1</sup>

**Institution:** <sup>1</sup>Department of Surgery, Stomatology, Pathology, and Radiology, Bauru School of Dentistry, University of São Paulo. Alameda Octávio Pinheiro Brisolla, 9-75, Bauru, SP, 17012-901, Brazil; <sup>2</sup>Department of Pediatric Dentistry, Orthodontics, and Collective Health, Bauru School of Dentistry, University of São Paulo. Alameda Octávio Pinheiro Brisolla, 9-75, Bauru, SP, 17012-901, Brazil.

**Corresponding author:** Cássia Maria Fischer Rubira. Department of Surgery, Stomatology, Pathology, and Radiology, Bauru School of Dentistry - University of São Paulo, Bauru - São Paulo, Brazil. Alameda Octávio Pinheiro Brisola, 9-75, Vila Universitária ZIP CODE: 17012-901 Bauru-SP / Brazil. Telephone: +55 14 32358254; Fax: +55 14 32358258. E-mail: [rubira@fob.usp.br](mailto:rubira@fob.usp.br).

**Table S5.** Data regarding clinical features, microscopic features, degrees of dysplasia, and malignancy rate of the included studies

| <b>Author / Year</b>              | <b>Clinical N</b> | <b>Clinical features</b>                                                                                                                                           | <b>Microscopic N</b> | <b>Microscopic features</b>                                                                                                  | <b>Degrees of dysplasia</b>                                                   | <b>Malignancy rate</b> |
|-----------------------------------|-------------------|--------------------------------------------------------------------------------------------------------------------------------------------------------------------|----------------------|------------------------------------------------------------------------------------------------------------------------------|-------------------------------------------------------------------------------|------------------------|
| <b>Markopoulos et al., 2004</b>   | n=65              | Atrophy=31; Ulceration=35; White plaque=19.                                                                                                                        | n=65                 | -                                                                                                                            | Mild dysplasia=18; Moderate dysplasia=20; Severe dysplasia=16.                | 16.92%                 |
| <b>Cavalcante et al., 2008</b>    | n=29              | Blurred demarcation between the lip vermilion and skin=17; Atrophy=21; Crust=10; Dryness=29; Erythema=17; Scaling=19; Swelling=18; Ulceration=17; White plaque=12. | n=29                 | Acanthosis=25; Atrophy=16; Granulose=11; Hyperkeratosis=16; Inflammatory infiltrate=29; Solar elastosis=29; Vasodilation=29. | -                                                                             | 10.34%                 |
| <b>Piccelli, 2008</b>             | n=48              | Blurred demarcation between the lip vermilion and skin=36; Atrophy=32; Erythema=24; Scaling=34; Ulceration=18; White plaque=16.                                    | n=48                 | Atrophy=4; Dyskeratosis=46; Epithelial hyperplasia=41; Normal epithelium=2.                                                  | No dysplasia=21; Mild dysplasia=19; Moderate dysplasia=7; Severe dysplasia=1. | -                      |
| <b>Martins Filho et al., 2011</b> | n=40              | Blurred demarcation between the lip vermilion and skin=13; Atrophy=29; Erythema=29; Fissure=9; Ulceration=4; White plaque=8; White spot=24.                        | n=20                 | -                                                                                                                            | Mild dysplasia=2; Moderate dysplasia=11; Severe dysplasia=5.                  | 10%                    |

**Table S5.** Data regarding clinical features, microscopic features, degrees of dysplasia, and malignancy rate of the included studies

|                               |          |                                                                                                                                                                                                                    |          |                                                                                                      |                                                                                                               |        |
|-------------------------------|----------|--------------------------------------------------------------------------------------------------------------------------------------------------------------------------------------------------------------------|----------|------------------------------------------------------------------------------------------------------|---------------------------------------------------------------------------------------------------------------|--------|
| <b>Pacca et al., 2011</b>     | AC: n=29 | Blurred demarcation between the lip vermilion and skin=27; Atrophy=22; Bleeding=1; Crust=9; Dryness=29; Erythema=23; Fissure=16; Loss of lip elasticity=16; Scaling=23; Swelling=3; Ulceration=7. White plaque=18. | AC: n=29 | -                                                                                                    | Mild dysplasia=14; Moderate dysplasia=10; Severe dysplasia=5.                                                 | -      |
| <b>Fernandes, 2013</b>        | n=20     | Blurred demarcation between the lip vermilion and skin=20; Atrophy=20; Crust=5; Red stain=19; White plaque=12; White spot=15.                                                                                      | n=20     | -                                                                                                    | No dysplasia=2; Mild dysplasia=8; Moderate dysplasia=8; Severe dysplasia=2.                                   | -      |
| <b>Lopes et al., 2015</b>     | n=161    | Pigmented area=9 of 161; Red plaque=37 of 143; Ulceration=9 of 161; White plaque=48 of 143.                                                                                                                        | n=83     | -                                                                                                    | Low risk=50 of 83; High risk=33 of 83.                                                                        | -      |
| <b>Cremonesi et al., 2017</b> | n=56     | Atrophy=21; White plaque=21.                                                                                                                                                                                       | n=31     | Dyskeratosis=4; Hyperchromatism=14; Inflammatory infiltrate=23; Pleomorphism=14; Solar elastosis=15. | -                                                                                                             | 16.07% |
| <b>Medeiros, 2018</b>         | n=20     | Blurred demarcation between the lip vermilion and skin=20; Atrophy=6; Dryness=17; Erosion=4; Erythema=8; Fissure=1; Loss of lip elasticity=2; Scaling=13; Ulceration=1; White plaque=13; White spot=16.            | n=20     | -                                                                                                    | No dysplasia=6; Mild dysplasia=10; Moderate dysplasia=3; Severe dysplasia=1.<br><br>Low risk=15; High risk=5. | -      |

**Table S5.** Data regarding clinical features, microscopic features, degrees of dysplasia, and malignancy rate of the included studies

|                           |                        |                                                                                                                                                                                                                                                                                                                                                                                   |                        |                                                                                                                                                                                                                                                                                                                                      |                                                                                                                                                                           |   |
|---------------------------|------------------------|-----------------------------------------------------------------------------------------------------------------------------------------------------------------------------------------------------------------------------------------------------------------------------------------------------------------------------------------------------------------------------------|------------------------|--------------------------------------------------------------------------------------------------------------------------------------------------------------------------------------------------------------------------------------------------------------------------------------------------------------------------------------|---------------------------------------------------------------------------------------------------------------------------------------------------------------------------|---|
| <b>Brito et al., 2019</b> | n=40                   | Mixed appearance=10; Red plaque=10; White plaque=19.                                                                                                                                                                                                                                                                                                                              | n=40                   | Hyperkeratosis=20.                                                                                                                                                                                                                                                                                                                   | Mild dysplasia=8; Moderate dysplasia=10; Severe dysplasia=2.                                                                                                              | - |
| <b>Ferreira, 2019</b>     | AC: n=25<br>SCC: n=36  | AC: Blurred demarcation between the lip vermilion and skin=24; Atrophy=16; Crust=4; Erythema=19; Scaling=8; White plaque=9.<br><br>SCC: Blurred demarcation between the lip vermilion and skin=35; Atrophy=31; Crust=12; Erythema=34; Scaling=11; White plaque=25.                                                                                                                | AC: n=25<br>SCC: n=36  | -                                                                                                                                                                                                                                                                                                                                    | AC: Mild dysplasia=15; Moderate dysplasia=5; Severe dysplasia=5.<br><br>SCC: SCC "in situ"=5; Superficially invasive SCC=24; Invasive SCC=7.                              | - |
| <b>Rocha, 2019</b>        | AC: n=131<br>SCC: n=51 | AC: Blurred demarcation between the lip vermilion and skin=131; Atrophy=127; Crust=9; Dryness=131; Erythema=81; Fissure=124; Scaling=128; Swelling=80; Ulceration=59; White plaque=81.<br><br>SCC: Blurred demarcation between the lip vermilion and skin=51; Atrophy=51; Crust=26; Dryness=51; Erythema=49; Fissure=48; Scaling=51; Swelling=47; Ulceration=45; White plaque=34. | AC: n=131<br>SCC: n=51 | AC: Acanthosis=128; Atrophy=114; Epithelial hyperplasia=22; Hyperkeratosis=131; Inflammatory infiltrate=43; Solar elastosis=100; Ulceration=55; Vasodilation=5.<br><br>SCC: Acanthosis=48; Atrophy=37; Epithelial hyperplasia=12; Hyperkeratosis=51; Inflammatory infiltrate=48; Solar elastosis=35; Ulceration=49; Vasodilation=40. | AC: No dysplasia=42; Mild dysplasia=58; Moderate dysplasia=29; Severe dysplasia=2.<br><br>SCC: SCC "in situ"=3; Superficially invasive SCC=35; Invasive SCC=12; Others=1. | - |

**Table S5.** Data regarding clinical features, microscopic features, degrees of dysplasia, and malignancy rate of the included studies

|                                  |      |                                                                                     |      |   |                                                                        |   |
|----------------------------------|------|-------------------------------------------------------------------------------------|------|---|------------------------------------------------------------------------|---|
| <b>Abrantes et al.,<br/>2021</b> | n=66 | Fundamental lesion:<br>Nodule=4; Plaque=29;<br>Spot=12; Ulcer=15; N.I.=6.           | n=66 | - | Mild dysplasia=9;<br>Moderate<br>dysplasia=19; Severe<br>dysplasia=38. | - |
|                                  |      | Color: White=32;<br>White/red=15; Red=6;<br>brown=2; Normal=3;<br>Others=2; N.I.=6. |      |   | Low risk=36; High<br>risk=30.                                          |   |
|                                  |      | Surface: Irregular=22;<br>Flat=18; Ulcerated=11;<br>Hardened=5; N.I.=10             |      |   |                                                                        |   |

SCC, squamous cell carcinoma; AC, actinic cheilitis; N.I., Not informed.
